# Supplementary material
Source: publisher figshare collection journal article supplement (https://acs.figshare.com/ndownloader/files/24172770)
Supplement: Supplementary file 1 [file 24172770]

## **Supporting Information**

### **Lysosomal re-acidification ameliorates vinyl carbamate-induced toxicity and disruption on lysosomal pH**

Yuting Li<sup>a</sup>, Dongwen Hu<sup>a</sup>, Jifeng Qi<sup>b</sup>, Sunliang Cui<sup>b</sup>, Wei Chen<sup>a,c,\*</sup>

<sup>a</sup> Department of Food Science and Nutrition, Zhejiang Key Laboratory for Agro-Food Processing, Zhejiang University, Hangzhou 310058, China.

<sup>b</sup> Institute of Drug Discovery and Design, College of Pharmaceutical Sciences, Zhejiang University, Hangzhou 310058, China

<sup>c</sup> Ningbo Research Institute, Zhejiang University, Ningbo 315100, China.

#### **\* Corresponding author:**

Prof. Wei Chen, Ph.D.

Department of Food Science and Nutrition, Zhejiang University, No.866 Yuhangtang Road, Xihu District, Hangzhou 310058, China.

Tel: +86 571 88982861      Fax: +86 571 88982191

E-mail: [zjuchenwei@zju.edu.cn](mailto:zjuchenwei@zju.edu.cn)

Fig. S1

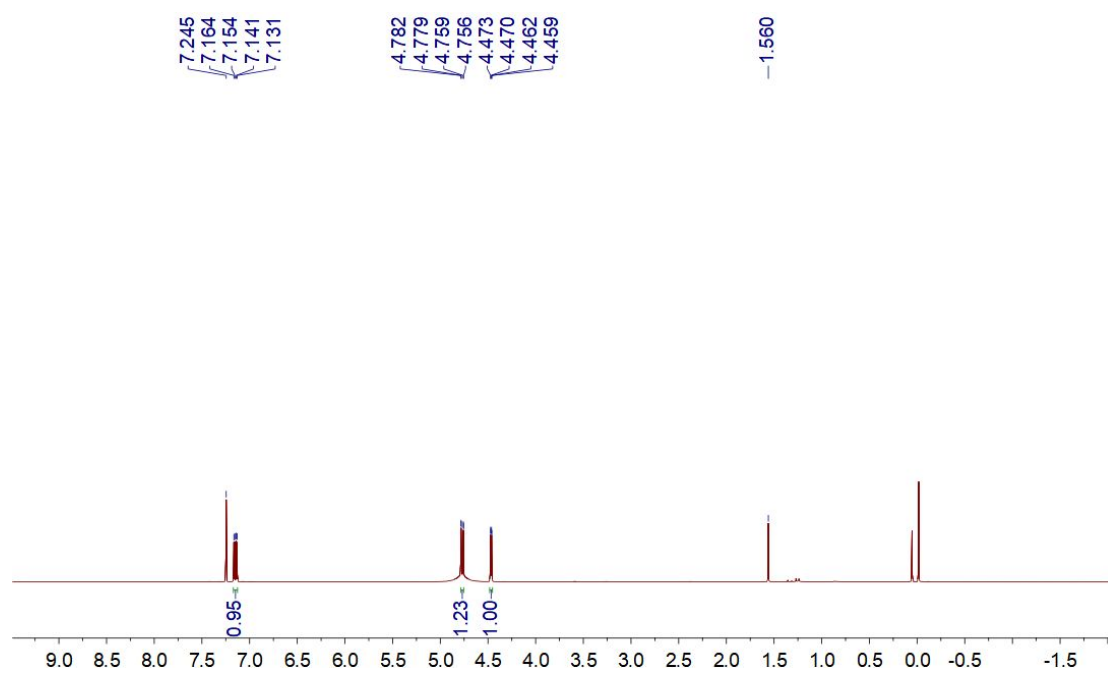

(a) <sup>1</sup>H NMR for Vinyl Carbamate

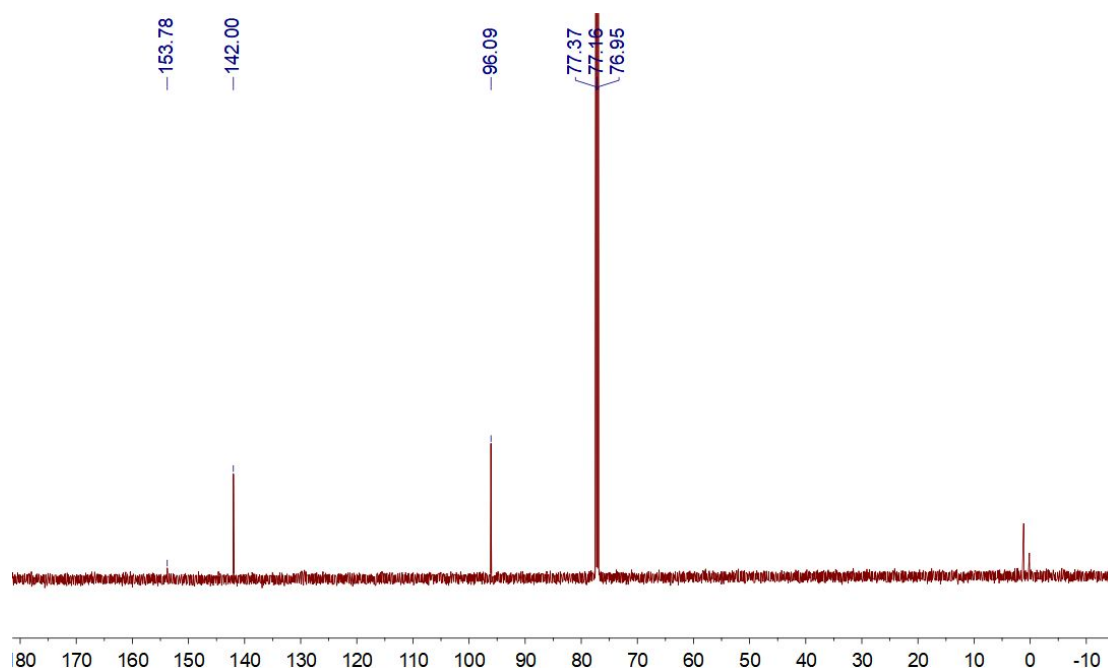

(b) <sup>13</sup>C NMR for Vinyl Carbamate

**Fig. S2**

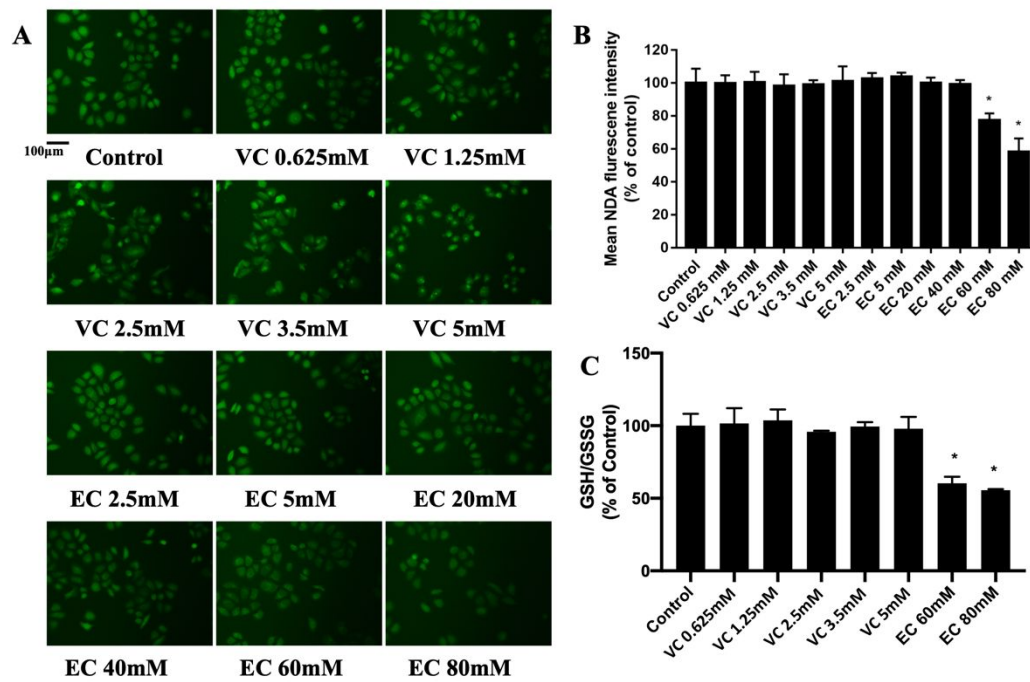

L02 cells were treated with different concentrations of VC or EC for 24 h. (A) Effect of VC treatment on intracellular GSH level. (B) The quantitative data of panel (A) were calculated by ImageProPlus and expressed as mean NDA fluorescence intensity. (C) GSH/GSSG ratio. EC, ethyl carbamate; VC, vinyl carbamate; GSH, glutathione; NDA, naphthalene-2, 3-dicarboxaldehyde. \* $p < 0.05$ .

**Fig. S3**

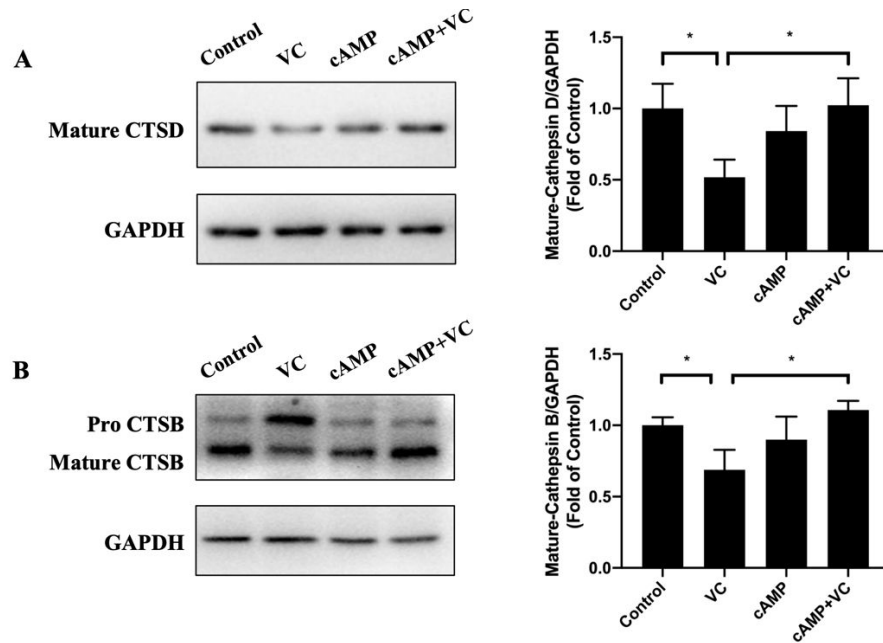

After incubation with 4 mM cAMP for 1 h, L02 cells were treated with 2.5 mM VC for 24 h. (A) and (C) Immunoblot analysis of CTSD expression. (B) and (D) Immunoblot analysis of CTSB expression. VC, vinyl carbamate, cAMP, cyclic adenosine monophosphate; CTSB, cathepsin B; CTSD, cathepsin D. \* $p < 0.05$ .

**Fig. S4**

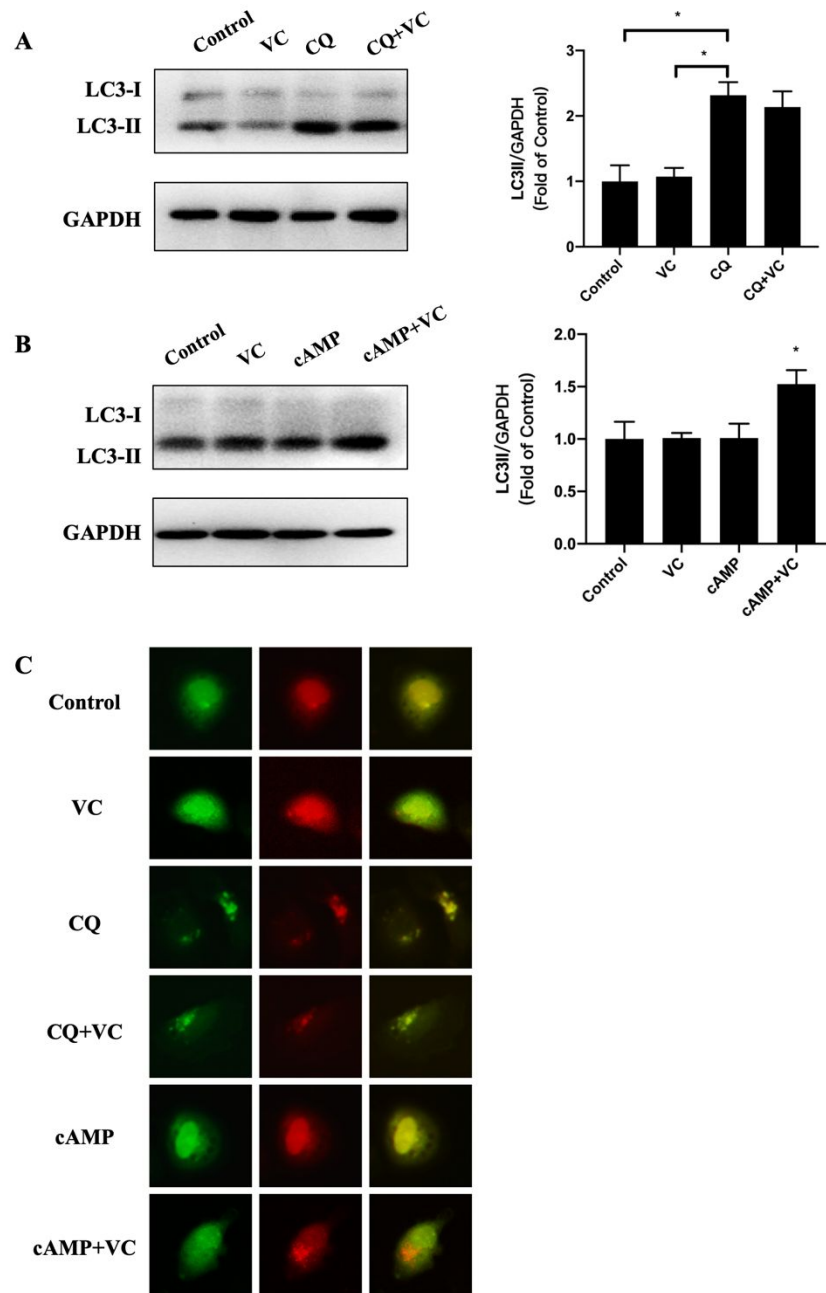

After incubation with 4 mM cAMP or 20  $\mu$ M CQ for 1 h, L02 cells were treated with 2.5 mM VC for 24 h. (A) Immunoblot analysis of LC3 expression. (B) Immunoblot analysis of LC3 expression. (C) Morphology of L02 cells transfected with GFP-RFP-LC3. VC, vinyl carbamate, CQ, chloroquine; cAMP, cyclic adenosine monophosphate. \* $p < 0.05$ .

**Fig. S5**

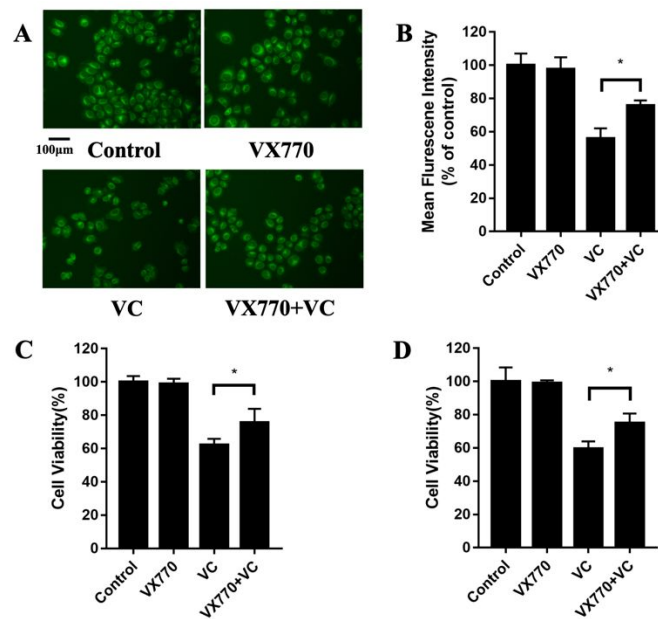

L02 cells were incubated with 5  $\mu$ M VX770 for 1 h, and then treated with 2.5 mM VC for 24 h. (A) L02 cells staining with LysoSensor Green. (B) The quantitative data of panel (A) were calculated by ImageProPlus and expressed as mean fluorescence intensity. (C, D) The influence of VX770 on cell viability under VC exposure tested by MTT and SRB assay. VC, vinyl carbamate CFTR, cystic fibrosis transmembrane conductance regulator; CFTRi, CFTR inhibitor 172. \* $p < 0.05$ .
